# Supplementary material for: Developing policy-ready digital dashboards of geospatial access to emergency obstetric care: a survey of policymakers and researchers in sub-Saharan Africa
Source: Springer Nature journal article supplement (doi:10.1007/s12553-023-00793-9), 2023-12-07
Supplement: 12553_2023_793_MOESM1_ESM.pdf [file 12553_2023_793_MOESM1_ESM.pdf]

**POLICY MAKERS QUESTIONNAIRE****EmOC research for a policy-ready-made graphic panel design**

This survey aims at understanding the considerations needed for developing policy-ready dashboards presenting geospatial access to emergency obstetric care (EmOC) in sub-Saharan Africa.

**Declaration of the participant**

I have read the information sheet. I understand that I may refuse to participate or withdraw from participation at any time. I certify that I am 18 years of age or older and freely give my consent to participate in this study.

## Declaration of the participant

- I volunteer to take part in this survey.
- I decided not to participate in the survey.

**This survey contains four sections in a total of 27 questions and will take approximately 20 minutes to complete.**

- Section A - User demographic data
- Section B- Study area
- Section C - Dashboard Feature
- Section D - Dashboard maintenance

**SECTION A - USER DEMOGRAPHIC DATA****Your age group**

- 1. Your age group**
  - a. 18 - 30 years old
  - b. 31 - 40 years old
  - c. 41 - 50 years old
  - d. 51 - 60 years old
  - e. 61+ years old
  - f. I prefer not to say

**Your profession**

- 2. Which sub-Saharan African country do you work for?**

--- pick one option ---Angola, Benin, Botswana, Burkina, Faso, Burundi, Cameroon, Cape Verde, Central African Republic, Chad, Comoros, Congo, Republic of the Congo, Cote d'Ivoire, ESwatini (also known as Swaziland) Guinea, Equatorial Guinea, Eritrea, Ethiopia, Gabon, Gambia, Ghana, Guinea, Guinea Bissau, Kenya, Lesotho, Liberia, Madagascar, Malawi, Mali, Mauritania, Mauritius, Mozambique, Namibia, Nigeria, Rwanda, Sao Tome and Principe, Senegal, Seychelles, Sierra Leone, Somalia, South Africa, Sudan, Tanzania, Togo, Uganda, Zambia, Zimbabwe

- 3. What area of public sector do you work in?**

- 4. What is your job title?**

**SECTION B - STUDY AREA AND GEOGRAPHICAL BARRIERS**

*All questions in this section refer to the sub-Saharan African country you work for.*

- 5. Which areas (regions/districts/cities) are mainly affected by poor geographical access to emergency obstetric care services? List at least 5 areas (or as many as you can), from most affected to least affected, separated by commas.**

**6. Thinking about the most affected area you listed, how would you describe this area?** (Tick all that apply) *You can choose several options.*

- a. Remote and rural areas
- b. Hard-to-reach areas
- c. Conflict zones
- d. Less affluent/poor areas
- e. Areas with very low population densities
- f. Areas where certain ethnic or religious groups live
- g. Urban areas
- h. Informal settlements
- i. Urban periphery
- j. Other (please specify in the next page)

**7. List other characteristics of the most affected area** (skip putting N/A in the text box).

**8. Thinking about the most affected area you have listed, rate these factors regarding the relevance to the delay in geographical access to EmOC services.**

Ranking scale

- 0: Not relevant at all
- 1: Of little relevance
- 2: Somewhat relevant
- 3: Very relevant
- 4: Most relevant

| Factors                                                                                              | 0: Not relevant at all | 1: Of little relevance | 2: Somewhat relevant | 3: Very relevant | 4: Most relevant |
|------------------------------------------------------------------------------------------------------|------------------------|------------------------|----------------------|------------------|------------------|
| Lack/difficulty in obtaining motorised transport                                                     |                        |                        |                      |                  |                  |
| Poorly maintained roads                                                                              |                        |                        |                      |                  |                  |
| Insecurity or feeling unsafe in travel                                                               |                        |                        |                      |                  |                  |
| Rain and weather variations                                                                          |                        |                        |                      |                  |                  |
| Fewer specialists on duty                                                                            |                        |                        |                      |                  |                  |
| Ineffective indications                                                                              |                        |                        |                      |                  |                  |
| Poorly equipped EmOC facilities                                                                      |                        |                        |                      |                  |                  |
| Fewer or sparsely distributed EmOC facilities                                                        |                        |                        |                      |                  |                  |
| Cost of transportation (toll charge, expensive car park, fuel cost, expensive public transportation) |                        |                        |                      |                  |                  |
| Congested roads                                                                                      |                        |                        |                      |                  |                  |
| Car park some distance away from the facility                                                        |                        |                        |                      |                  |                  |
| Difficult terrain                                                                                    |                        |                        |                      |                  |                  |

**9. Specify and rate any other factors that you think are causing delays in accessing EmOC services** (Skip by putting N/A-not applicable, in the text box).

Use the same scale from 0 to 4 to rate the proposed factors, for example, traffic control stops (2).

Rating scale

- 0: Not relevant at all
- 1: Of little relevance
- 2: Somewhat relevant
- 3: Very relevant
- 4: Most relevant

**SECTION C - DASHBOARD DESIGN**

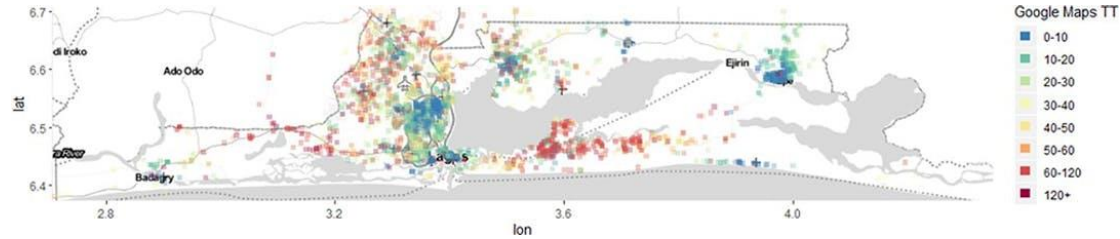

An example of what information could be displayed on the suggested dashboard.

This is a map of Lagos State showing travel time to EmOC facilities.

- 10. Outline the current roles of technology used in dealing with the delay in geographical access to EmOC services in your country of research.**
- 11. Outline other ways that you think technology can be used in dealing with the delay in accessing EmOC services.**
- 12. Rate these visual components regarding their importance to the suggested dashboard.**

Ranking scale

- 0: Not important at all
- 1: Of little importance
- 2: Of average importance
- 3: Very important
- 4: Absolutely essential

| Factors                                                                                                   | 0: Not important at all | 1: Of little importance | 2: Of average importance | 3: Very important | 4: Absolutely essential |
|-----------------------------------------------------------------------------------------------------------|-------------------------|-------------------------|--------------------------|-------------------|-------------------------|
| Geomap of EmOC facilities                                                                                 |                         |                         |                          |                   |                         |
| Travel barriers such as difficult terrain and congested roads                                             |                         |                         |                          |                   |                         |
| Heat map showing travel time to the nearest EmOC facility for different weather and/or traffic conditions |                         |                         |                          |                   |                         |
| Basic demographics and household finances                                                                 |                         |                         |                          |                   |                         |
| Car park provided at EmOC facilities                                                                      |                         |                         |                          |                   |                         |
| Public transport access points at EmOC facilities                                                         |                         |                         |                          |                   |                         |

- 13. Specify and rate any other visual components that would be important to you in the suggested dashboard (skip by putting N/A in the text box).**

Use the following scale to rate the proposed visual component, e.g., hierarchical administrative boundaries (4).

Ranking scale

- 0: Not important at all
- 1: Of little importance
- 2: Of average importance
- 3: Very important
- 4: Absolutely essential

- 14. At what geographical level would you like metrics (such as average travel time) to be summarised? (Tick all that apply)**
- EmOC facility catchment area
  - Buffer around the EmOC facility (e.g., 5km, 10km, 1 hour drive, 1 hour on foot)
  - City blocks or estates
  - Ward level
  - City level
  - State Level
  - Other (specify in the next page)
- 15. Specify here any other geographical level you would like the metrics to be summarized at? (Skip by putting N/A in the text box)**
- 16. What modelling scenarios in the dashboard would be of interest to you as a policymaker? (Tick all that apply)**  
(Skip by putting N/A-not applicable in the text box)
- What if a lower facility tier was upgraded in the area that is marginalised?
  - What if ambulances were available 24/7 when needed?
  - Other (specify in the next page)
- 17. Specify here any other modelling scenarios (other than the ones already mentioned) that would be of interest to you for the suggested dashboard?**
- 18. What added value do you think the suggested dashboard could provide in dealing with delay in geographical access to EmOC services?**
- 19. Would you use such a dashboard as a guide for policy making?**
- Yes
  - No
  - Not sure

**20. Which organizations in your country would benefit from such work?**

The final dashboard will allow user's flexible viewing of OnTIME consortium's results on travel time estimates to EmOC services. To your knowledge, which research groups or institutes in your country would be most interested?

**SECTION D – DASHBOARD MAINTENANCE**

- 21. Overall, how often do you think the dashboard needs an update?**
- Annually
  - Twice a year
  - Quarterly
  - Monthly
  - Weekly
  - Daily
  - Other frequency (specify in the next page)
  - Not sure
- 22. Specify here another frequency that you would like the dashboard to be updated (skip, putting N/A, in the text box).**

**23. Regarding maintenance expense, what would be the best approach to sustain and maintain the dashboard?**

(Tick all that apply)

- a. Build capacity with ministries of health with regular refresher courses
- b. Subscription fee for maintenance and support
- c. Donor funding for maintenance
- d. Other (specify in the next page)

**24. Specify here any other good approach to sustain and maintain the dashboard** (skip by putting N/A, in the text box).

**25. In addition to the online platform, do you think a mobile phone application would be useful?**

- a. Yes.
- b. No.
- c. I'm not sure.

**26. Use this space to add any additional thoughts and comments you may have.** (Skip, putting N/A, in the text box)

**27. Would you like to be notified of the findings of this work?**

- a. Yes, please.
- b. No, I'm not interested.

**Thank you very much for your participation and your valuable contributions!**

More information about our project can be found here: <https://www.ontimeconsortium.org>

.....

## RESEARCHERS QUESTIONNAIRE

### EmOC research for a policy-ready-made graphic panel design

This survey aims at understanding the considerations needed for developing policy-ready dashboards presenting geospatial access to emergency obstetric care (EmOC) in sub-Saharan Africa.

#### Declaration of the participant

I have read the information sheet. I understand that I may refuse to participate or withdraw from participation at any time. I certify that I am 18 years of age or older and freely give my consent to participate in this study.

Declaration of the participant

- I volunteer to take part in this survey.
- I decided not to participate in the survey.

**This survey contains four sections in a total of 27 questions and will take approximately 20 minutes to complete.**

- Section A - User demographic data (4 questions)
- Section B- Study area (3 questions)
- Section C - Dashboard Feature (8 questions)
- Section D - Dashboard maintenance (3 questions)

#### SECTION A - USER DEMOGRAPHIC DATA

1. **Your age group**
  - a. 18 - 30 years old
  - b. 31 - 40 years old
  - c. 41 - 50 years old
  - d. 51 - 60 years old
  - e. 61+ years old
  - f. I prefer not to say

#### Your profession

2. **What is your job title?**
3. **What is your research field?**

4. **Which sub-Saharan Africa country do you conduct research on the most in the last five years?**

--- pick one option ---Angola, Benin, Botswana, Burkina, Faso, Burundi, Cameroon, Cape Verde, Central African Republic, Chad, Comoros, Congo, Republic of the Congo, Cote d'Ivoire, ESwatini (also known as Swaziland) Guinea, Equatorial Guinea, Eritrea, Ethiopia, Gabon, Gambia, Ghana, Guinea, Guinea Bissau, Kenya, Lesotho, Liberia, Madagascar, Malawi, Mali, Mauritania, Mauritius, Mozambique, Namibia, Nigeria, Rwanda, Sao Tome and Principe, Senegal, Seychelles, Sierra Leone, Somalia, South Africa, Sudan, Tanzania, Togo, Uganda, Zambia, Zimbabwe

#### SECTION B - STUDY AREA AND GEOGRAPHICAL BARRIERS

*All questions in this section refer to the sub-Saharan African country you work for.*

5. **Which areas (regions/districts/cities) are mainly affected by poor geographical access to emergency obstetric care services? List at least 5 areas (or as many as you can), from most affected to least affected, separated by commas.**

**6. Thinking about the most affected area you listed, how would you describe this area?** (tick all that apply) *You can choose several options.*

- a. Remote and rural areas
- b. Hard-to-reach areas
- c. Conflict zones
- d. Less affluent/poor areas
- e. Areas with very low population densities
- f. Areas where certain ethnic or religious groups live
- g. Urban areas
- h. Informal settlements
- i. Urban periphery
- j. Other (please specify in the next page)

**7. List other characteristics of the most affected area** (skip putting N/A in the text box).

**8. Regarding the most affected area you have listed, rate these factors regarding the relevance to the delay in geographical access to EmOC services.**

Ranking scale

0: Not relevant at all

1: Of little relevance

2: Somewhat relevant

3: Very relevant

4: Most relevant

| Factors                                                                                              | 0: Not relevant at all | 1: Of little relevance | 2: Somewhat relevant | 3: Very relevant | 4: Most relevant |
|------------------------------------------------------------------------------------------------------|------------------------|------------------------|----------------------|------------------|------------------|
| Lack/difficulty in obtaining motorised transport                                                     |                        |                        |                      |                  |                  |
| Poorly maintained roads                                                                              |                        |                        |                      |                  |                  |
| Insecurity or feeling unsafe in travel                                                               |                        |                        |                      |                  |                  |
| Rain and weather variations                                                                          |                        |                        |                      |                  |                  |
| Fewer specialists on duty                                                                            |                        |                        |                      |                  |                  |
| Ineffective indications                                                                              |                        |                        |                      |                  |                  |
| Poorly equipped EmOC facilities                                                                      |                        |                        |                      |                  |                  |
| Fewer or sparsely distributed EmOC facilities                                                        |                        |                        |                      |                  |                  |
| Cost of transportation (toll charge, expensive car park, fuel cost, expensive public transportation) |                        |                        |                      |                  |                  |
| Congested roads                                                                                      |                        |                        |                      |                  |                  |
| Car park some distance away from the facility                                                        |                        |                        |                      |                  |                  |
| Difficult terrain                                                                                    |                        |                        |                      |                  |                  |

**9. Specify and rate any other factors that you think are causing delays in accessing EmOC services** (skip by putting N/A-not applicable, in the text box).

Use the same scale from 0 to 4 to rate the proposed factors, for example, traffic control stops (2).

Rating scale

0: Not relevant at all

1: Of little relevance

2: Somewhat relevant

3: Very relevant

4: Most relevant

**SECTION C - DASHBOARD DESIGN**

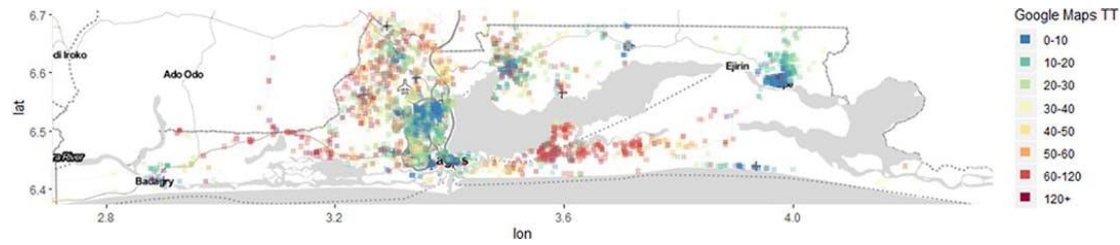

An example of what information could be displayed on the suggested dashboard.  
This is a map of Lagos State showing travel time to EmOC facilities.

**10. Outline the current roles of technology used in dealing with the delay in geographical access to EmOC services in your country of research.**

**11. Outline other ways that you think technology can be used in dealing with the delay in accessing EmOC services.**

**12. Rate these visual components regarding their importance to the suggested dashboard.**

Ranking scale

- 0: Not important at all
- 1: Of little importance
- 2: Of average importance
- 3: Very important
- 4: Absolutely essential

| Factors                                                                                                   | 0: Not important at all | 1: Of little importance | 2: Of average importance | 3: Very important | 4: Absolutely essential |
|-----------------------------------------------------------------------------------------------------------|-------------------------|-------------------------|--------------------------|-------------------|-------------------------|
| Geomap of EmOC facilities                                                                                 |                         |                         |                          |                   |                         |
| Travel barriers such as difficult terrain and congested roads                                             |                         |                         |                          |                   |                         |
| Heat map showing travel time to the nearest EmOC facility for different weather and/or traffic conditions |                         |                         |                          |                   |                         |
| Basic demographics and household finances                                                                 |                         |                         |                          |                   |                         |
| Car park provided at EmOC facilities                                                                      |                         |                         |                          |                   |                         |
| Public transport access points at EmOC facilities                                                         |                         |                         |                          |                   |                         |

**13. Specify and rate any other visual components that would be important to you in the suggested dashboard (skip by putting N/A in the text box).**

Use the following scale to rate the proposed visual component, e.g., hierarchical administrative boundaries (4).

Ranking scale

- 0: Not important at all
- 1: Of little importance
- 2: Of average importance
- 3: Very important
- 4: Absolutely essential



**14. At what level of spatial granularity would you like the metrics (such as average travel time) to be summarised? (Tick all that apply)**

- a. EmOC facility catchment area
- b. Buffer around the EmOC facility (e.g., 5km, 10km, 1 hour drive, 1 hour on foot)
- c. City blocks or estates
- d. Ward level
- e. City level
- f. State Level
- g. Other (specify in the next page)

**15. Specify here any other level of spatial granularity you would like the metrics to be summarized at (skip by putting N/A in the text box)**

**16. What modelling scenarios in the dashboard would be of interest to you as a researcher? (Tick all that apply)**

- a. What if a lower facility tier was upgraded in the area that is marginalised?
- b. What if ambulances were available 24/7 when needed?
- c. Other (specify on next page)

**17. Specify here any other modelling scenarios (other than the ones already mentioned) that would be of interest to you for the suggested dashboard?**

**18. What added value do you think the suggested dashboard could provide in dealing with delay in geographical access to EmOC services?**

**19. Would you use such a dashboard for your research?**

- a. Yes
- b. No
- c. Not sure

**20. Which research groups or institutes in your country would benefit from such work?**

The final dashboard will allow users flexible viewing of OnTIME consortium's results on travel time estimates to EmOC services. To your knowledge, which research groups or institutes in your country would be most interested?

#### **SECTION D – DASHBOARD MAINTENANCE**

**21. Overall, how often do you think the dashboard needs an update?**

- a. Annually
- b. Twice a year
- c. Quarterly
- d. Monthly
- e. Weekly
- f. Daily
- g. Other frequency (specify in the next page)
- h. Not sure

**22. Specify here another frequency that you would like the dashboard to be updated (skip, putting N/A, in the text box).**

**23. Regarding maintenance expense, what would be the best approach to sustain and maintain the dashboard?**

(Tick all that apply)

- a. Build capacity with ministries of health with regular refresher courses
- b. Subscription fee for maintenance and support
- c. Donor funding for maintenance
- d. Other (specify in the next page)

**24. Specify here any other good approach to sustain and maintain the dashboard** (skip by putting N/A, in the text box).

**25. In addition to the online platform, do you think a mobile phone application would be useful?**

- a. Yes.
- b. No.
- c. I'm not sure.

**26. Use this space to add any additional thoughts and comments you may have.** (Skip, putting N/A, in the text box)

**27. Would you like to be notified of the findings of this work?**

- a. Yes, please.
- b. No, I'm not interested.

**Thank you very much for your participation and your valuable contributions!**

More information about our project can be found here: <https://www.ontimeconsortium.org>

.....

## QUESTIONNAIRE POUR LES DÉCIDEURS POLITIQUES

### Recherche EmOC pour la conception d'un panneau graphique prêt pour la politique

Cette enquête vise à comprendre les considérations nécessaires au développement de tableaux de bord prêts à l'emploi présentant l'accès géospatial aux soins obstétricaux d'urgence (SOU) en Afrique subsaharienne.

#### Déclaration du participant

J'ai lu la fiche d'information. Je comprends que je peux refuser de participer ou me retirer de la participation à tout moment. Je certifie que je suis âgé(e) de 18 ans ou plus et que je donne librement mon consentement à participer à cette étude.

#### Déclaration du participant

- Je me porte volontaire pour participer à cette enquête.
- J'ai décidé de ne pas participer à l'enquête.

**Cette enquête contient quatre sections pour un total de 27 questions et prendra environ 20 minutes à compléter.**

- Section A - Données démographiques de l'utilisateur
- Section B- Zone d'étude
- Section C - Fonctionnalité du tableau de bord
- Section D - Maintenance du tableau de bord

#### SECTION A - DONNÉES DÉMOGRAPHIQUE DE L'UTILISATEUR

##### Votre groupe d'âge

##### 1. Votre groupe d'âge

- 18 - 30 ans
- 31 - 40 ans
- 41 - 50 ans
- 51 - 60 ans
- 61+ ans
- Je préfère ne pas le dire

##### Votre profession

##### 2. Pour quel pays d'Afrique subsaharienne travaillez-vous ?

--- choisissez une option ---Angola, Bénin, Botswana, Burkina, Faso, Burundi, Cameroun, Cap-Vert, République centrafricaine, Tchad, Comores, Congo, République du Congo, Côte d'Ivoire, ESwatini (également connu sous le nom de Swaziland) Guinée, Guinée équatoriale, Erythrée, Ethiopie, Gabon, Gambie, Ghana, Guinée, Guinée Bissau, Kenya, Lesotho, Liberia, Madagascar, Malawi, Mali, Mauritanie, Maurice, Mozambique, Namibie, Nigeria, Rwanda, Sao Tomé et Príncipe, Sénégal, Seychelles, Sierra Leone, Somalie, Afrique du Sud, Soudan, Tanzanie, Togo, Ouganda, Zambie, Zimbabwe

##### 3. Dans quel domaine du secteur public travaillez-vous ?

##### 4. Quel est le titre de votre poste ?

#### SECTION B - ZONE D'ÉTUDE ET OBSTACLES GÉOGRAPHIQUES

Toutes les questions de cette section font référence au pays d'Afrique subsaharienne pour lequel vous travaillez.

5. Quelles zones (régions/quartiers/villes) principalement affectées par une faible accessibilité géographique aux services de soins obstétricaux d'urgence ? Énumérez au moins 5 zones (ou autant que vous pouvez), de la plus affectée à la moins affectée, en les séparant par des virgules.

**6. En pensant à la zone la plus affectée que vous avez listée, comment décririez-vous cette zone?** (Cochez toutes les cases qui s'appliquent) *Vous pouvez choisir plusieurs options.*

- a. Zones éloignées et rurales
- b. Zones difficiles à atteindre
- c. Zones de conflit
- d. Zones moins riches/pauvres
- e. Zones à très faible densité de population
- f. Les zones où vivent certains groupes ethniques ou religieux
- g. Zones urbaines
- h. Habitations informelles
- i. Périphérie urbaine
- j. Autre (veuillez préciser à la page suivante)

**7. Énumérez les autres caractéristiques de la zone la plus touchée** (passer cette question en écrivant N/A dans la zone de texte).

**8. En pensant à la zone que vous avez citée, évaluez ces facteurs en fonction de leurs pertinences par rapport au retard d'accès géographique aux SOU.**

Échelle de classement

0 : Pas du tout pertinent

1 : Peu pertinent

2 : Assez pertinent

3 : Très pertinent

4 : Le plus pertinent

| Facteurs                                                                          | 0 : Pas du tout pertinent | 1 : Peu pertinent | 2 : Assez pertinent | 3 : Très pertinent | 4 : Le plus pertinent |
|-----------------------------------------------------------------------------------|---------------------------|-------------------|---------------------|--------------------|-----------------------|
| Manque/difficulté à obtenir un transport motorisé                                 |                           |                   |                     |                    |                       |
| Routes mal entretenues                                                            |                           |                   |                     |                    |                       |
| Insécurité ou sentiment d'insécurité en voyage                                    |                           |                   |                     |                    |                       |
| Pluie et variations météorologiques                                               |                           |                   |                     |                    |                       |
| Moins de spécialistes en service                                                  |                           |                   |                     |                    |                       |
| Indications inefficaces                                                           |                           |                   |                     |                    |                       |
| Installations de soins obstétricaux d'urgence mal équipées                        |                           |                   |                     |                    |                       |
| Installations EmOC moins nombreuses ou faiblement réparties                       |                           |                   |                     |                    |                       |
| Coût du transport (péage, parking cher, coût du carburant, transport public cher) |                           |                   |                     |                    |                       |
| Routes encombrées                                                                 |                           |                   |                     |                    |                       |
| Parking à une certaine distance de l'établissement                                |                           |                   |                     |                    |                       |
| Terrain difficile                                                                 |                           |                   |                     |                    |                       |

**9. Précisez et évaluez tout autre facteur qui, selon vous, est à l'origine des retards dans l'accès aux services de soins obstétricaux d'urgence** (sautez en inscrivant N/A - non applicable, dans la zone de texte). Utilisez la même échelle de 0 à 4 pour évaluer les facteurs proposés, par exemple, les arrêts de contrôle de la circulation (2).

Échelle d'évaluation

0 : Pas du tout pertinent

1 : Peu pertinent

2 : Assez pertinent

3 : Très pertinent

4 : Le plus pertinent

**SECTION C - CONCEPTION DU TABLEAU DE BORD**

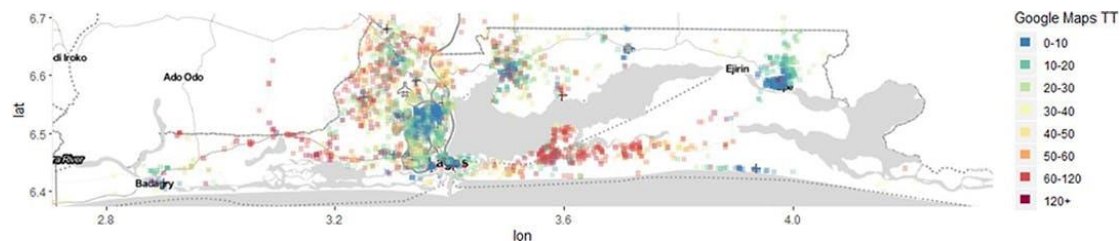

Un exemple des informations qui pourraient être affichées sur le tableau de bord suggéré.  
Voici une carte de l'État de Lagos montrant le temps de trajet jusqu'aux établissements EmOC.

**10. Décrire les rôles actuels de la technologie qui est utilisée pour faire face au retard à l'accès géographique au SOU dans votre pays.**

**11. Proposez d'autres façons où l'usage de la technologie peut faire face au retard à l'accès aux services SOU.**

**12. Évaluer ces éléments visuels en fonction de leur importance par rapport au tableau de bord proposé.**

Échelle de classement

0 : Pas du tout important

1 : De peu d'importance

2 : D'importance moyenne

3 : Très important

4 : Absolument essentiel

| Facteurs                                                                                                                                         | 0 : Pas du tout important | 1 : De peu d'importance | 2 : D'importance moyenne | 3 : Très important | 4 : Absolument essentiel |
|--------------------------------------------------------------------------------------------------------------------------------------------------|---------------------------|-------------------------|--------------------------|--------------------|--------------------------|
| Géocarte des installations EmOC                                                                                                                  |                           |                         |                          |                    |                          |
| Les obstacles au voyage tels que les terrains difficiles et les routes encombrées                                                                |                           |                         |                          |                    |                          |
| Carte thermique montrant le temps de trajet jusqu'au centre SOU le plus proche pour différentes conditions météorologiques et/ou de circulation. |                           |                         |                          |                    |                          |
| Données démographiques de base et finances du ménage                                                                                             |                           |                         |                          |                    |                          |
| Parking prévu dans les installations de l'EmOC                                                                                                   |                           |                         |                          |                    |                          |
| Points d'accès aux transports publics dans les établissements EmOC                                                                               |                           |                         |                          |                    |                          |

**13. Spécifier et évaluer tout autre élément visuel qui serait important pour vous dans le tableau de bord proposé (Passer cette question en écrivant N/A).**

Utilisez l'échelle suivante pour évaluer la composante visuelle proposée, par exemple, les limites administratives hiérarchiques (4).

Échelle de classement

0 : Pas du tout important

1 : De peu d'importance

2 : D'importance moyenne

3 : Très important

4 : Absolument essentiel

- 14. À quel niveau d'analyse géographique souhaitez-vous que les mesures (telles que le temps de trajet) soient regroupées? (Cochez tout ce qui s'applique)**
- a. Zone d'attraction de l'installation EmOC
  - b. Tampon autour de l'installation EmOC (par exemple, 5km, 10km, 1 heure en voiture, 1 heure à pied)
  - c. Blocs urbains ou domaines
  - d. Niveau des quartiers
  - e. Niveau de la ville
  - f. Niveau de l'État
  - g. Autre (précisez à la page suivante)

**15. Indiquez ici tout autre niveau géographique auquel vous souhaitez que les mesures soient regroupées.** (Passer cette question en écrivant N/A).

- 16. Quels scénarios de modélisation du tableau de bord permettraient d'orienter l'élaboration de politiques visant à améliorer l'accès géographique aux soins médicaux d'urgence dans votre pays ?** (Cochez toutes les cases qui s'appliquent)
- a. Et si un niveau d'installation inférieur était amélioré dans la zone qui est marginalisée ?
  - b. Et si les ambulances étaient disponibles 24h/24 et 7j/7 en cas de besoin ?
  - c. Autre (précisez à la page suivante)

**17. Précisez ici tout autre modélisation de scénarios (autre que ceux déjà mentionnés) qui vous intéresserait dans le tableau de bord proposé?**

**18. Quelle valeur ajoutée pensez-vous que le tableau de bord suggéré pourrait apporter pour traiter les retards dans l'accès géographique aux services d'EmOC ?**

**19. Utiliseriez-vous un tel tableau de bord comme un guide pour l'élaboration des politiques?**

- a. Oui
- b. Non
- c. Pas sûr

**20. Quelles organisations dans votre pays pourraient bénéficier d'un tel travail ?**

Le tableau de bord final permettra à l'utilisateur de visualiser de manière flexible les résultats du consortium OnTIME sur les estimations de temps de trajet vers les services EmOC. À votre connaissance, quels groupes ou instituts de recherche de votre pays seraient les plus intéressés ?

#### **SECTION D – DASHBOARD MAINTENANCE**

**21. Dans l'ensemble, à quelle fréquence pensez-vous que le tableau de bord doit être mis à jour ?**

- a. Annuellement
- b. Deux fois par an
- c. Trimestrielle
- d. Mensuel
- e. Hebdomadaire
- f. Quotidiennement
- g. Autre fréquence (précisez à la page suivante)
- h. Pas sûr

**22. Indiquez ici une autre fréquence à laquelle vous souhaitez que le tableau de bord soit mis à jour** (passez, en mettant N/A, dans la zone de texte).

**23. En ce qui concerne les frais de maintenance, quelle serait la meilleure façon pour maintenir et entretenir le tableau de bord? (Cochez toutes les cases qui s'appliquent)**

- a. Renforcer les capacités des ministères de la santé avec des cours de recyclage réguliers
- b. Frais d'abonnement pour la maintenance et l'assistance
- c. Financement des donateurs pour la maintenance
- d. Autre (précisez à la page suivante)

**24. Préciser ici toute autre bonne approche pour maintenir et entretenir le tableau de bord** (Passer cette question en écrivant N/A dans la zone de texte).

**25. En plus de la plateforme en ligne, pensez-vous qu'une application mobile serait utile?**

- a. Oui.
- b. Non.
- c. Je ne suis pas sûr.

**26. Utilisez cet espace pour ajouter des réflexions et des commentaires supplémentaires que vous pourriez avoir.** (Sauter, en mettant N/A, dans la zone de texte)

**27. Souhaitez-vous être informé des résultats de ce travail ?**

- a. Oui, s'il vous plaît.
- b. Non, je ne suis pas intéressé.

**Merci beaucoup pour votre participation et vos précieuses contributions !**

Vous trouverez de plus amples informations sur notre projet ici : <https://www.ontimeconsortium.org>.

.....

## QUESTIONNAIRE DES CHERCHEURS

### Recherche EmOC pour la conception d'un panneau graphique prêt pour la politique

Cette enquête vise à comprendre les considérations nécessaires au développement de tableaux de bord prêts à l'emploi présentant l'accès géospatial aux soins obstétricaux d'urgence (SOU) en Afrique subsaharienne.

#### Déclaration du participant

J'ai lu la fiche d'information. Je comprends que je peux refuser de participer ou me retirer de la participation à tout moment. Je certifie que je suis âgé(e) de 18 ans ou plus et que je donne librement mon consentement à participer à cette étude.

Déclaration du participant

- Je me porte volontaire pour participer à cette enquête.
- J'ai décidé de ne pas participer à l'enquête.

**Cette enquête contient quatre sections pour un total de 27 questions et prendra environ 20 minutes à compléter.**

- Section A - Données démographiques de l'utilisateur (4 questions)
- Section B- Zone d'étude (3 questions)
- Section C - Fonctionnalité du tableau de bord (8 questions)
- Section D - Maintenance du tableau de bord (3 questions)

#### SECTION A - DONNÉES DÉM DÉM DÉM DÉM DÉM DÉM DÉM DE L'UTILISATEUR

##### 1. Votre groupe d'âge

- a. 18 - 30 ans
- b. 31 - 40 ans
- c. 41 - 50 ans
- d. 51 - 60 ans
- e. 61+ ans
- f. Je préfère ne pas le dire

#### Votre profession

##### 2. Quel est le titre de votre poste ?

##### 3. Quel est votre domaine de recherche ?

##### 4. Sur quel pays d'Afrique subsaharienne avez-vous effectué le plus de recherches au cours des cinq dernières années ?

--- choisissez une option ---Angola, Bénin, Botswana, Burkina, Faso, Burundi, Cameroun, Cap-Vert, République centrafricaine, Tchad, Comores, Congo, République du Congo, Côte d'Ivoire, ESwatini (également connu sous le nom de Swaziland) Guinée, Guinée équatoriale, Erythrée, Ethiopie, Gabon, Gambie, Ghana, Guinée, Guinée Bissau, Kenya, Lesotho, Liberia, Madagascar, Malawi, Mali, Mauritanie, Maurice, Mozambique, Namibie, Nigeria, Rwanda, Sao Tomé et Príncipe, Sénégal, Seychelles, Sierra Leone, Somalie, Afrique du Sud, Soudan, Tanzanie, Togo, Ouganda, Zambie, Zimbabwe

#### SECTION B - ZONE D'ÉTUDE ET OBSTACLES GÉOGRAPHIQUES

Toutes les questions de cette section se rapportent au pays d'Afrique subsaharienne pour lequel vous travaillez.

5. Quelles zones (régions/districts/villes) sont principalement touchées par un mauvais accès géographique aux services de soins obstétricaux d'urgence? Citez au moins 5 zones (ou autant que vous le pouvez), de la plus touchée à la moins touchée, en les séparant par une virgule.



**6. En pensant à la zone la plus touchée que vous avez citée, comment décririez-vous cette zone?** (Cochez toutes les cases qui s'appliquent) *Vous pouvez choisir plusieurs options.*

- a. Zones éloignées et rurales
- b. Zones difficiles à atteindre
- c. Zones de conflit
- d. Zones moins riches/pauvres
- e. Zones à très faible densité de population
- f. Les zones où vivent certains groupes ethniques ou religieux
- g. Zones urbaines
- h. Habitations informelles
- i. Périphérie urbaine
- j. Autre (veuillez préciser à la page suivante)

**7. Énumérez les autres caractéristiques de la zone la plus touchée** (Passer cette question en écrivant N/A dans la zone de texte).

**8. En pensant à la zone que vous avez citée, évaluez ces facteurs en fonction de leurs pertinences par rapport au retard d'accès géographique aux SOU.**

Échelle de classement

0 : Pas du tout pertinent

1 : Peu pertinent

2 : Assez pertinent

3 : Très pertinent

4 : Le plus pertinent

| Facteurs                                                                             | 0 : Pas du tout pertinent | 1 : Peu pertinent | 2 : Assez pertinent | 3 : Très pertinent | 4 : Le plus pertinent |
|--------------------------------------------------------------------------------------|---------------------------|-------------------|---------------------|--------------------|-----------------------|
| Manque/difficulté à obtenir un transport motorisé                                    |                           |                   |                     |                    |                       |
| Routes mal entretenues                                                               |                           |                   |                     |                    |                       |
| Insécurité ou sentiment d'insécurité en voyage                                       |                           |                   |                     |                    |                       |
| Pluie et variations météorologiques                                                  |                           |                   |                     |                    |                       |
| Moins de spécialistes en service                                                     |                           |                   |                     |                    |                       |
| Indications inefficaces                                                              |                           |                   |                     |                    |                       |
| Installations de soins obstétricaux d'urgence mal équipées                           |                           |                   |                     |                    |                       |
| Installations EmOC moins nombreuses ou faiblement réparties                          |                           |                   |                     |                    |                       |
| Coût du transport (péage, parking cher, coût du carburant, transports publics chers) |                           |                   |                     |                    |                       |
| Routes encombrées                                                                    |                           |                   |                     |                    |                       |
| Parking à une certaine distance de l'établissement                                   |                           |                   |                     |                    |                       |
| Terrain difficile                                                                    |                           |                   |                     |                    |                       |

**9. Précisez et évaluez tout autre facteur qui, selon vous, est à l'origine de retards dans l'accès aux services de soins obstétricaux d'urgence** (passez votre chemin en inscrivant N/A - non applicable, dans la zone de texte).

Utilisez la même échelle de 0 à 4 pour évaluer les facteurs proposés, par exemple, les arrêts de contrôle de la circulation (2).

Échelle d'évaluation

0 : Pas du tout pertinent

1 : Peu pertinent

2 : Assez pertinent

3 : Très pertinent

4 : Le plus pertinent

### SECTION C - CONCEPTION D'UN TABLEAU DE BORD

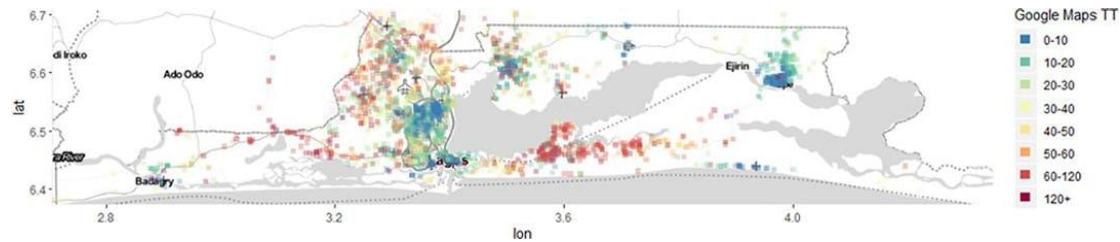

Un exemple des informations qui pourraient être affichées sur le tableau de bord suggéré.  
Voici une carte de l'État de Lagos montrant le temps de trajet jusqu'aux établissements EmOC.

**10. Décrivez les rôles actuels de la technologie utilisée pour faire face au retard d'accès géographique aux services SOU dans votre pays de recherche.**

**11. Indiquez d'autres façons dont vous pensez que la technologie peut être utilisée pour traiter le retard dans l'accès aux services d'urgence et de soins médicaux.**

**12. Notez ces composants visuels en fonction de leur importance pour le tableau de bord proposé.**

Échelle de classement

0 : Pas du tout important

1 : De peu d'importance

2 : D'importance moyenne

3 : Très important

4 : Absolument essentiel

| Facteurs                                                                                                                                         | 0 : Pas du tout important | 1 : De peu d'importance | 2 : D'importance moyenne | 3 : Très important | 4 : Absolument essentiel |
|--------------------------------------------------------------------------------------------------------------------------------------------------|---------------------------|-------------------------|--------------------------|--------------------|--------------------------|
| Géocarte des installations EmOC                                                                                                                  |                           |                         |                          |                    |                          |
| Les obstacles au voyage tels que les terrains difficiles et les routes encombrées                                                                |                           |                         |                          |                    |                          |
| Carte thermique montrant le temps de trajet jusqu'au centre SOU le plus proche pour différentes conditions météorologiques et/ou de circulation. |                           |                         |                          |                    |                          |
| Données démographiques de base et finances du ménage                                                                                             |                           |                         |                          |                    |                          |
| Parking prévu dans les installations de l'EmOC                                                                                                   |                           |                         |                          |                    |                          |
| Points d'accès aux transports publics dans les établissements EmOC                                                                               |                           |                         |                          |                    |                          |

**13. Spécifier et évaluer tout autre élément visuel qui serait important pour vous dans le tableau de bord proposé (Passer cette question en écrivant N/A).**

Utilisez l'échelle suivante pour évaluer la composante visuelle proposée, par exemple les limites administratives hiérarchiques (4).

Échelle de classement

0 : Pas du tout important

1 : De peu d'importance

2 : D'importance moyenne

3 : Très important

4 : Absolument essentiel

- 14. A quel niveau de granularité spatiale souhaitez-vous que les mesures soient regroupées?** (Cochez tout ce qui s'applique)
- Zone d'attraction de l'installation EmOC
  - Tampon autour de l'installation EmOC (par exemple, 5km, 10km, 1 heure en voiture, 1 heure à pied)
  - Blocs urbains ou domaines
  - Niveau des quartiers
  - Niveau de la ville
  - Niveau de l'État
  - Autre (précisez à la page suivante)
- 15. Indiquez ici tout autre niveau de granularité spatiale auquel vous souhaitez que les mesures soient regroupées.** (Passer cette question en écrivant N/A)
- 16. Quelle modélisation des scénarios dans le tableau de bord vous intéresserait en tant que chercheur?** (Cochez tout ce qui s'applique)
- Que se passe-t-il si un niveau d'installation inférieur était amélioré dans la zone qui est marginalisée?
  - Que se passe-t-il si les ambulances étaient disponibles 24 heures sur 24, 7 jours sur 7, en cas de besoin?
  - Autre (précisez à la page suivante)
- 17. Précisez ici tout autre modélisation de scénarios (autre que ceux déjà mentionnés) qui vous intéresserait dans le tableau de bord proposé?**
- 18. Selon vous, quelle valeur ajoutée le tableau de bord proposé pourrait-il apporter pour faire face au retard à l'accès géographique aux services SOU?**
- 19. Utiliseriez-vous un tel tableau de bord pour vos recherches?**
- Oui
  - Non
  - Pas sûr

**20. Dans votre pays, pour quels groupes de recherche ou instituts un tel travail serait bénéfique?**

Le tableau de bord final permettra aux utilisateurs une visualisation flexible des résultats du consortium OnTIME sur l'estimation des temps de trajet vers les services EmOC. À votre connaissance, quels groupes ou instituts de recherche de votre pays seraient les plus intéressés ?

**SECTION D – DASHBOARD MAINTENANCE**

**21. A votre avis, à quelle fréquence faut-il mettre à jour le tableau de bord?**

- Annuellement
- Deux fois par an
- Trimestrielle
- Mensuel
- Hebdomadaire
- Quotidiennement
- Autre fréquence (précisez à la page suivante)
- Pas sûr

**22. Spécifier ici une autre fréquence à laquelle vous souhaitez que le tableau de bord soit mis à jour** (Passer cette question en écrivant N/A).

**23. En ce qui concerne les frais d'entretien, quelle serait la meilleure approche pour maintenir et entretenir le tableau de bord ? (Cochez toutes les cases qui s'appliquent)**

- a. Renforcer les capacités des ministères de la santé avec des cours de recyclage réguliers
- b. Frais d'abonnement pour la maintenance et l'assistance
- c. Financement des donateurs pour la maintenance
- d. Autre (précisez à la page suivante)

**24. Spécifiez ici toute autre bonne approche pour soutenir et maintenir le tableau de bord** (passez votre chemin en mettant N/A, dans la zone de texte).

**25. En plus de la plateforme en ligne, pensez-vous qu'une application mobile serait utile?**

- a. Oui.
- b. Non.
- c. Je ne suis pas sûr.

**26. Utilisez cet espace pour ajouter toute réflexion et tout commentaire supplémentaire que vous pourriez avoir.**  
(Sauter, en mettant N/A, dans la zone de texte)

**27. Souhaitez-vous être informé des résultats de ce travail ?**

- a. Oui, s'il vous plaît.
- b. Non, je ne suis pas intéressé.

**Merci beaucoup pour votre participation et vos précieuses contributions !**

Vous trouverez de plus amples informations sur notre projet ici : <https://www.ontimeconsortium.org>.

## QUESTIONÁRIO AOS DECISORES POLÍTICOS

### Pesquisa EmOC para uma política - design de painel gráfico pronto

Esta pesquisa visa compreender as considerações necessárias para o desenvolvimento de painéis gráficos que apresentem o acesso geoespacial ao atendimento obstétrico de emergência (EmOC) na África subsaariana.

#### Declaração do participante

Eu li a ficha de informação. Entendo que posso me recusar a participar ou desistir de participar a qualquer momento. Certifico que tenho 18 anos de idade ou mais e dou livremente meu consentimento para participar deste estudo.

#### Declaração do participante

- Aceito voluntariamente para participar desta pesquisa.
- Decidi não participar da pesquisa.

**Este inquérito contém quatro secções num total de 27 perguntas e demorará aproximadamente 20 minutos a completar.**

- Secção 1 - Dados demográficos dos usuários
- Secção B- Área de estudo
- Secção 3 - Característica do Painel gráfico
- Secção 4 - Manutenção do painel gráfico

#### SECÇÃO A - DADOS DEMOGRÁFICOS DOS UTILIZADORES

1. Sua faixa etária
  - a. 18 - 30 anos
  - b. 31 - 40 anos
  - c. 41 - 50 anos
  - d. 51 - 60 anos
  - e. 61+ anos
  - f. Prefiro não dizer

#### A sua profissão

2. Qual é o seu título de trabalho?
3. Qual é o seu cargo?

4. Para que país da África Subsaariana trabalha?

--- escolha uma opção ---Angola, Benin, Botswana, Burkina, Faso, Burundi, Camarões, Cabo Verde, República Centro Africana, Chade, Comores, Congo, República do Congo, Costa do Marfim, ESwatini (também conhecida como Suazilândia) Guiné, Guiné Equatorial, Eritreia, Etiópia, Gabão, Gâmbia, Gana, Guiné, Guiné Bissau, Quênia, Lesoto, Libéria, Madagáscar, Malawi, Mali, Mauritânia, Maurícia, Moçambique, Namíbia, Nigéria, Ruanda, São Tomé e Príncipe, Senegal, Seicheles, Serra Leoa, Somália, África do Sul, Sudão, Tanzânia, Togo, Uganda, Zâmbia, Zimbabué

#### SECÇÃO B - ÁREA DE ESTUDO E BARREIRAS GEOGRÁFICAS

*Todas as perguntas desta secção se referem ao país da África subsaariana para o qual você trabalha.*

5. Que áreas (regiões/distritos/cidades) são principalmente afectadas pelo fraco acesso geográfico aos serviços de atendimento obstétrico de emergência? Liste pelo menos 5 áreas (ou quantas puder), desde as mais afectadas até as menos afectadas, separadas por vírgulas.
6. Pensando na área mais afectada que você listou, como você descreveria esta área? (assinale todas as que se

Questionário sobre as considerações necessárias para o painel de bordo de geo-acesso EmOC Wang et al., 2023 aplicam).

- a. Áreas remotas e rurais
- b. Áreas difíceis de alcançar
- c. Zonas de conflito
- d. Áreas menos afluentes/pobres
- e. Áreas com densidades populacionais muito baixas
- f. Áreas onde vivem certos grupos étnicos ou religiosos
- g. Áreas urbanas
- h. Assentamentos informais
- i. Periferia urbana
- j. Outros (por favor especifique na próxima página)

**7. Liste outras características da área mais afectada (pular colocando N/A na caixa de texto).**

**8. Em relação à área mais afectada listada, classifique estes factores quanto à relevância do atraso no acesso geográfico aos serviços da EmOC.**

Escala de classificação

0: Não relevante

1: Pouca relevância

2: moderada relevância

3: Muito relevante

4: Muitíssimo relevante

| Factores                                                                                              | 0: Não relevante de todo | 1: De pouca relevância | 2: Algo relevante | 3: Muito relevante | 4: Mais relevantes |
|-------------------------------------------------------------------------------------------------------|--------------------------|------------------------|-------------------|--------------------|--------------------|
| Falta/dificuldade na obtenção de transporte motorizado                                                |                          |                        |                   |                    |                    |
| Estradas mal conservadas                                                                              |                          |                        |                   |                    |                    |
| Insegurança ou sensação de inseguro nas viagens                                                       |                          |                        |                   |                    |                    |
| Chuva e variações meteorológicas                                                                      |                          |                        |                   |                    |                    |
| Menos especialistas em serviço                                                                        |                          |                        |                   |                    |                    |
| Indicações ineficazes                                                                                 |                          |                        |                   |                    |                    |
| Instalações EmOC mal equipadas                                                                        |                          |                        |                   |                    |                    |
| Menos ou escassamente distribuídas instalações EmOC                                                   |                          |                        |                   |                    |                    |
| Custo do transporte (portagem, estacionamento caro, custo do combustível, transportes públicos caros) |                          |                        |                   |                    |                    |
| Estradas congestionadas                                                                               |                          |                        |                   |                    |                    |
| Estacionamento a alguma distância das instalações                                                     |                          |                        |                   |                    |                    |
| Terreno difícil                                                                                       |                          |                        |                   |                    |                    |

**9. Especifique e classifique quaisquer outros factores que você acha que estão causando atrasos no acesso aos serviços EmOC (Pule, colocando N/A-não aplicável, na caixa de texto).**

Use a mesma escala de 0 a 4 para classificar os factores propostos, por exemplo, as paragens de controlo de tráfego (2).

Escala de classificação

0: Não relevante

1: Pouca relevância

2: moderada relevância

3: Muito relevante

4: Muitíssimo relevante

### SECÇÃO C - PROJECTO DO PAINEL GRÁFICO

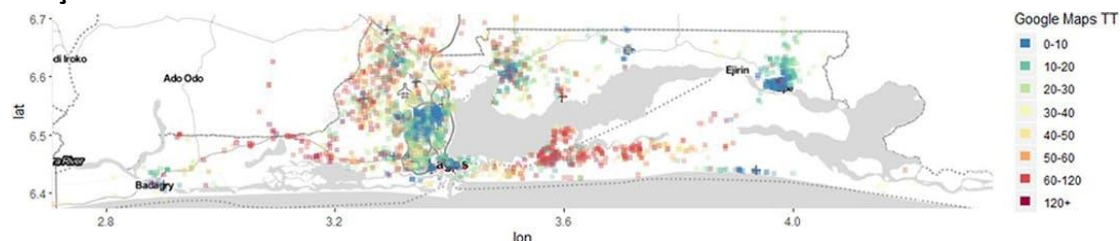

Um exemplo de quais informações poderiam ser visualizadas no painel sugerido.

Este é um mapa do estado de Lagos mostrando o tempo de viagem até as instalações da EmOC.

**10. Descreva os papéis actuais da tecnologia utilizada para lidar com o atraso no acesso geográfico aos serviços EmOC em seu país de pesquisa.**

**11. Descreva outras formas que você acha que a tecnologia pode ser usada para lidar com o atraso no acesso aos serviços EmOC.**

**12. Avalie estes componentes visuais quanto à sua importância para o painel gráfico sugerido.**

Escala de classificação

0: Não tem importância nenhuma

1: De pouca importância

2: De importância média

3: Muito importante

4: Absolutamente essencial

| Factores                                                                                                                              | 0: Não tem importância nenhuma | 1: De pouca importância | 2: De importância média | 3: Muito importante | 4: Absolutamente essencial |
|---------------------------------------------------------------------------------------------------------------------------------------|--------------------------------|-------------------------|-------------------------|---------------------|----------------------------|
| Geomap das instalações da EmOC                                                                                                        |                                |                         |                         |                     |                            |
| Barreiras de viagem tais como terrenos difíceis e estradas congestionadas                                                             |                                |                         |                         |                     |                            |
| Mapa de calor mostrando o tempo de viagem até à instalação EmOC mais próxima para diferentes condições meteorológicas e/ou de tráfego |                                |                         |                         |                     |                            |
| Demografia básica e finanças domésticas                                                                                               |                                |                         |                         |                     |                            |
| Parque de estacionamento fornecido nas instalações da EmOC                                                                            |                                |                         |                         |                     |                            |
| Pontos de acesso aos transportes públicos nas instalações da EmOC                                                                     |                                |                         |                         |                     |                            |

**13. Especifique e classifique quaisquer outros componentes visuais que seriam importantes para você no painel sugerido (pule colocando N/A na caixa de texto).**

Use a seguinte escala para classificar o componente visual proposto, por exemplo, limites administrativos hierárquicos (4).

Escala de classificação

0: Não tem importância nenhuma

1: De pouca importância

2: De importância média

3: Muito importante

4: Absolutamente essencial

**14. A que nível geográfico de granularidade espacial gostaria que as métricas (como o tempo médio de viagem) fossem resumidas?** (Assinale todas as que se aplicam)

- a. Área de captação das instalações da EmOC
- b. Amortecedor ao redor da instalação EmOC (por exemplo, 5km, 10km, 1 hora de carro, 1 hora a pé)
- c. Quarteirões ou propriedades
- d. Nível de enfermaria
- e. Nível da cidade
- f. Nível de Estado
- g. Outros (especifique na próxima página)

**15. Especifique aqui qualquer outro nível geográfico em que gostaria que as métricas fossem resumidas em?** (Saltar colocando N/A na caixa de texto)

**16. Que cenários de modelagem no painel visual seriam de seu interesse como pesquisador?** (Assinale todos os que se aplicam)

- a. E se um nível mais baixo de instalações for melhorada na área que é marginalizada?
- b. E se as ambulâncias estivessem disponíveis 24 horas por dia, 7 dias por semana, quando necessário?
- c. Outras (especifique na próxima página)

**17. Especifique aqui qualquer outro cenário de modelagem (além dos já mencionados) seria de seu interesse para o painel gráfico sugerido?**

**18. Que valor agregado você acha que o painel gráfico sugerido poderia oferecer ao lidar com o atraso no acesso geográfico aos serviços da EmOC?**

**19. Utilizaria um painel de instrumentos como guia para a elaboração de políticas?**

- a. Sim
- b. Não
- c. Não tenho a certeza

**20. Que organizações no seu país beneficiariam de tal trabalho?**

O painel gráfico final permitirá aos usuários uma visualização flexível dos resultados do consórcio OnTIME em estimativas de tempo de viagem para os serviços EmOC. Ao seu conhecimento, quais grupos ou institutos de pesquisa em seu país estariam mais interessados?

#### **SECÇÃO D - MANUTENÇÃO DO PAINEL DE INSTRUMENTOS**

**21. Em geral, com que frequência você acha que o painel gráfico precisa de uma actualização?**

- a. Anualmente
- b. Duas vezes por ano
- c. Trimestralmente
- d. Mensal
- e. Semanalmente
- f. Diário
- g. Outra frequência (especificar na página seguinte)
- h. Não tenho a certeza

**22. Especifique aqui outra frequência que você gostaria que o painel gráfico fosse actualizado** (Pule, colocando N/A-não aplicável, na caixa de texto).



- 23. Relativamente às despesas de manutenção, qual seria a melhor abordagem para sustentar e manter o painel de instrumentos?** (Assinalar tudo o que se aplica)
- a. Capacitar os ministérios da saúde com cursos de actualização regulares
  - b. Taxa de assinatura para manutenção e apoio
  - c. Financiamento dos doadores para a manutenção
  - d. Outros (especificar na página seguinte)
- 24. Especificar aqui qualquer outra boa abordagem para sustentar e manter o painel de instrumentos** (saltar, colocando N/A, na caixa de texto).
- 25. Para além da plataforma online, acha que uma aplicação para telemóvel seria útil?**
- a. Sim.
  - b. Não.
  - c. Não tenho a certeza.
- 26. Utilize este espaço para acrescentar quaisquer pensamentos e comentários adicionais que possa ter.** (Saltar, colocando N/A, na caixa de texto)
- 27. Você gostaria de ser notificado sobre os resultados deste trabalho?**
- a. Sim, por favor.
  - b. Não, eu não estou interessado.

**Muito obrigado por sua participação e por suas valiosas contribuições!**

Mais informações sobre o nosso projecto podem ser encontradas aqui: <https://www.ontimeconsortium.org>

.....

## QUESTIONÁRIO AOS INVESTIGADORES

### Pesquisa EmOC para uma política - design de painel gráfico pronto

Esta pesquisa visa compreender as considerações necessárias para o desenvolvimento de painéis gráficos que apresentem o acesso geoespacial ao atendimento obstétrico de emergência (EmOC) na África subsaariana.

#### Declaração do participante

Eu li a ficha de informação. Entendo que posso me recusar a participar ou desistir de participar a qualquer momento. Certifico que tenho 18 anos de idade ou mais e dou livremente meu consentimento para participar deste estudo.

Declaração do participante

- Sou voluntário para participar neste inquérito.
- Decidi não participar no inquérito.

**Esta pesquisa contém quatro secções em um total de 27 perguntas e levará aproximadamente 20 minutos para ser concluída.**

- Secção A - Dados demográficos dos utilizadores
- Secção B- Área de estudo
- Secção C - Característica do Painel
- Secção D - Manutenção do painel de instrumentos

#### SECÇÃO A - DADOS DEMOGRÁFICOS DOS UTILIZADORES

1. Sua faixa etária
  - a. 18 - 30 anos
  - b. 31 - 40 anos
  - c. 41 - 50 anos
  - d. 51 - 60 anos
  - e. 61+ anos
  - f. Prefiro não dizer

#### A sua profissão

2. Qual é o seu título de trabalho?
3. Qual é o seu campo de investigação?
4. Que país da África Subsaariana é o que mais investigou nos últimos cinco anos?

--- escolha uma opção ---Angola, Benin, Botswana, Burkina, Faso, Burundi, Camarões, Cabo Verde, República Centro Africana, Chade, Comores, Congo, República do Congo, Costa do Marfim, ESwatini (também conhecida como Suazilândia) Guiné, Guiné Equatorial, Eritreia, Etiópia, Gabão, Gâmbia, Gana, Guiné, Guiné Bissau, Quênia, Lesoto, Libéria, Madagáscar, Malawi, Mali, Mauritânia, Maurícia, Moçambique, Namíbia, Nigéria, Ruanda, São Tomé e Príncipe, Senegal, Seicheles, Serra Leoa, Somália, África do Sul, Sudão, Tanzânia, Togo, Uganda, Zâmbia, Zimbabué

#### SECÇÃO B - ÁREA DE ESTUDO E BARREIRAS GEOGRÁFICAS

Todas as perguntas desta secção se referem ao país da África subsaariana que você mais pesquisa fez nos últimos cinco anos.

5. Que áreas (regiões/distritos/cidades) são principalmente afectadas pelo fraco acesso geográfico aos serviços de atendimento obstétrico de emergência? Liste pelo menos 5 áreas (ou quantas puder), desde as mais afectadas até as menos afectadas, separadas por vírgulas.

**6. Pensando na área mais afectada que listou, como descreveria esta área?** (assinale todas as que se aplicam)

*Pode escolher várias opções.*

- a. Áreas remotas e rurais
- b. Áreas difíceis de alcançar
- c. Zonas de conflito
- d. Áreas menos afluentes/pobres
- e. Áreas com densidades populacionais muito baixas
- f. Áreas onde vivem certos grupos étnicos ou religiosos
- g. Áreas urbanas
- h. Assentamentos informais
- i. Periferia urbana
- j. Outros (especificar na página seguinte)

**7. Listar outras características da área mais afectada** (Pule, colocando N/A-não aplicável, na caixa de texto).

**8. Em relação à área mais afectada listada, classifique estes factores quanto à relevância do atraso no acesso geográfico aos serviços da EmOC.**

Escala de classificação

- 0: Não relevante
- 1: Pouca relevância
- 2: moderada relevância
- 3: Muito relevante
- 4: Muitíssimo relevante

| Factores                                                                                              | 0: Não relevante de todo | 1: De pouca relevância | 2: Algo relevante | 3: Muito relevante | 4: Mais relevantes |
|-------------------------------------------------------------------------------------------------------|--------------------------|------------------------|-------------------|--------------------|--------------------|
| Falta/dificuldade na obtenção de transporte motorizado                                                |                          |                        |                   |                    |                    |
| Estradas mal conservadas                                                                              |                          |                        |                   |                    |                    |
| Insegurança ou sensação de inseguro nas viagens                                                       |                          |                        |                   |                    |                    |
| Chuva e variações meteorológicas                                                                      |                          |                        |                   |                    |                    |
| Menos especialistas em serviço                                                                        |                          |                        |                   |                    |                    |
| Indicações ineficazes                                                                                 |                          |                        |                   |                    |                    |
| Instalações EmOC mal equipadas                                                                        |                          |                        |                   |                    |                    |
| Menos ou escassamente distribuídas instalações EmOC                                                   |                          |                        |                   |                    |                    |
| Custo do transporte (portagem, estacionamento caro, custo do combustível, transportes públicos caros) |                          |                        |                   |                    |                    |
| Estradas congestionadas                                                                               |                          |                        |                   |                    |                    |
| Estacionamento a alguma distância das instalações                                                     |                          |                        |                   |                    |                    |
| Terreno difícil                                                                                       |                          |                        |                   |                    |                    |

**9. Especifique e classifique quaisquer outros factores que considere estarem a causar atrasos no acesso aos serviços EmOC** (saltar colocando N/A-não aplicável, na caixa de texto).

Utilizar a mesma escala de 0 a 4 para classificar os factores propostos, por exemplo, as paragens de controlo de tráfego (2).

Escala de classificação

- 0: Não relevante de todo
- 1: De pouca relevância
- 2: Algo relevante
- 3: Muito relevante
- 4: Mais relevantes

**SECÇÃO C - DESENHO DO PAINEL DE INSTRUMENTOS**

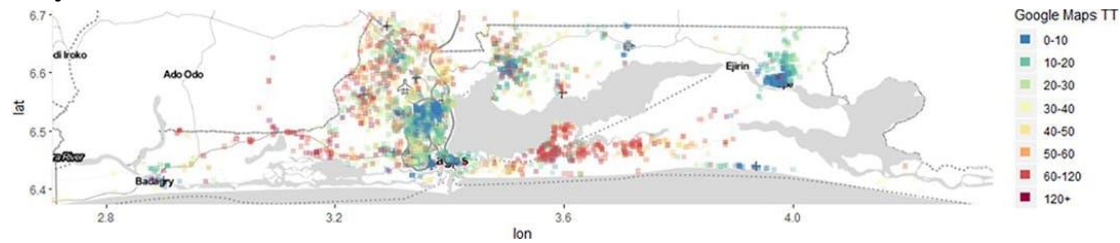

Um exemplo de quais informações poderiam ser visualizadas no painel sugerido.

Este é um mapa do estado de Lagos mostrando o tempo de viagem até as instalações da EmOC.

**10. Descreva os papéis actuais da tecnologia utilizada para lidar com o atraso no acesso geográfico aos serviços EmOC no seu país de investigação.**

**11. Descreva outras formas de pensar que a tecnologia pode ser utilizada para lidar com o atraso no acesso aos serviços EmOC.**

**12. Avalie estes componentes visuais quanto à sua importância para o painel de instrumentos sugerido.**

Escala de classificação

0: Não tem importância nenhuma

1: De pouca importância

2: De importância média

3: Muito importante

4: Absolutamente essencial

| Factores                                                                                                                              | 0: Não tem importância nenhuma | 1: De pouca importância | 2: De importância média | 3: Muito importante | 4: Absolutamente essencial |
|---------------------------------------------------------------------------------------------------------------------------------------|--------------------------------|-------------------------|-------------------------|---------------------|----------------------------|
| Geomap das instalações da EmOC                                                                                                        |                                |                         |                         |                     |                            |
| Barreiras de viagem tais como terrenos difíceis e estradas congestionadas                                                             |                                |                         |                         |                     |                            |
| Mapa de calor mostrando o tempo de viagem até à instalação EmOC mais próxima para diferentes condições meteorológicas e/ou de tráfego |                                |                         |                         |                     |                            |
| Demografia básica e finanças domésticas                                                                                               |                                |                         |                         |                     |                            |
| Parque de estacionamento fornecido nas instalações da EmOC                                                                            |                                |                         |                         |                     |                            |
| Pontos de acesso aos transportes públicos nas instalações da EmOC                                                                     |                                |                         |                         |                     |                            |

**13. Especificar e classificar quaisquer outros componentes visuais que seriam importantes para si no painel de instrumentos sugerido (saltar colocando N/A na caixa de texto).**

Utilizar a seguinte escala para classificar a componente visual proposta, por exemplo, limites administrativos hierárquicos (4).

Escala de classificação

0: Não tem importância nenhuma

1: De pouca importância

2: De importância média

3: Muito importante

4: Absolutamente essencial

**14. Em que nível de granularidade espacial você gostaria que as métricas (como o tempo médio de viagem) fossem resumidas?** Assinale todas as que se aplicam.

- a. Área de captação das instalações da EmOC
- b. Amortecedor ao redor da instalação EmOC (por exemplo, 5km, 10km, 1 hora de carro, 1 hora a pé)
- c. Quarteirões ou propriedades
- d. Nível de enfermaria
- e. Nível da cidade
- f. Nível de Estado
- g. Outros (especifique na próxima página)

**15. Especifique aqui qualquer outro nível geográfico em que gostaria que as métricas fossem resumidas em?** (Saltar colocando N/A na caixa de texto)

**16. Que cenários de modelagem no painel gráfico seriam de seu interesse como pesquisador?** (Assinale todos os que se aplicam)

- a. E se um nível inferior das instalações foi melhorado na área que é marginalizada?
- b. E se as ambulâncias estivessem disponíveis 24/7 quando necessário?
- c. Outras (especifique na próxima página)

**17. Especifique aqui qualquer outro cenário de modelagem (além dos já mencionados) seria de seu interesse para o painel gráfico sugerido?**

**18. Que valor acrescentado acha que o painel de instrumentos sugerido poderia proporcionar ao lidar com o atraso no acesso geográfico aos serviços EmOC?**

**19. Utilizaria tal painel de instrumentos para a sua investigação?**

- a. Sim
- b. Não
- c. Não tenho a certeza

**20. Que grupos ou institutos de pesquisa em seu país se beneficiariam de tal trabalho?**

O painel gráfico final permitirá aos usuários uma visualização flexível dos resultados do consórcio OnTIME em estimativas de tempo de viagem para os serviços EmOC. Ao seu conhecimento, quais grupos ou institutos de pesquisa em seu país estariam mais interessados?

#### **SECÇÃO D - MANUTENÇÃO DO PAINEL DE INSTRUMENTOS**

**21. Em geral, com que frequência pensa que o painel de instrumentos necessita de uma actualização?**

- a. Anualmente
- b. Duas vezes por ano
- c. Trimestralmente
- d. Mensal
- e. Semanalmente
- f. Diário
- g. Outra frequência (especificar na página seguinte)
- h. Não tenho a certeza

**22. Especifique aqui outra frequência que gostaria que o tablier fosse actualizado** (saltar, colocar N/A, na caixa de texto).

**23. Relativamente às despesas de manutenção, qual seria a melhor abordagem para sustentar e manter o painel de instrumentos? (Assinalar tudo o que se aplica)**

- e. Capacitar os ministérios da saúde com cursos de actualização regulares
- f. Taxa de assinatura para manutenção e apoio
- g. Financiamento dos doadores para a manutenção
- h. Outros (especificar na página seguinte)

**24. Especificar aqui qualquer outra boa abordagem para sustentar e manter o painel de instrumentos (saltar, colocando N/A, na caixa de texto).**

**25. Para além da plataforma online, acha que uma aplicação para telemóvel seria útil?**

- a. Sim.
- b. Não.
- c. Não tenho a certeza.

**26. Utilize este espaço para acrescentar quaisquer pensamentos e comentários adicionais que possa ter. (Saltar, colocando N/A, na caixa de texto)**

**27. Gostaria de ser notificado sobre as conclusões deste trabalho?**

- a. Sim, por favor.
- b. Não, não estou interessado.

**Muito obrigado por sua participação e por suas valiosas contribuições!**

Mais informações sobre o nosso projecto podem ser encontradas aqui: <https://www.ontimeconsortium.org>

.....
